# Supplementary material
Source: MDPI journal article supplement (https://www.mdpi.com/2076-3417/11/3/1207)
Supplement: s1 [file s1]

# Supplementary Materials: Effect of Compressive Strain Rate on Auxetic Foam

Olly Duncan <sup>1,2,\*</sup>, Nicolas Bailly <sup>3,4</sup>, Tom Allen <sup>1</sup>, Yvan Petit <sup>3,4</sup>, Eric Wagnac <sup>3,4</sup> and Andrew Alderson <sup>2</sup>

<sup>1</sup> Department of Engineering, Manchester Metropolitan University, Manchester M1 5GD, UK; t.allen@mmu.ac.uk

<sup>2</sup> Materials and Engineering Institute, Faculty of Science, Technology and Arts, Sheffield Hallam University, Sheffield S1 1WB, UK; a.alderon@shu.ac.uk

<sup>3</sup> Department of Mechanical Engineering, École de Technologie Supérieure, Montréal, QC H3C 1K3, Canada; nicolas1.bailly@gmail.com (N.B.); Yvan.Petit@etsmtl.ca (Y.P.); Eric.Wagnac@etsmtl.ca (E.W.)

<sup>4</sup> Research Centre, Hôpital du Sacré-Cœur de Montréal, Montréal, QC H4J 1C5, Canada

\* Correspondence: O.Duncan@mmu.ac.uk

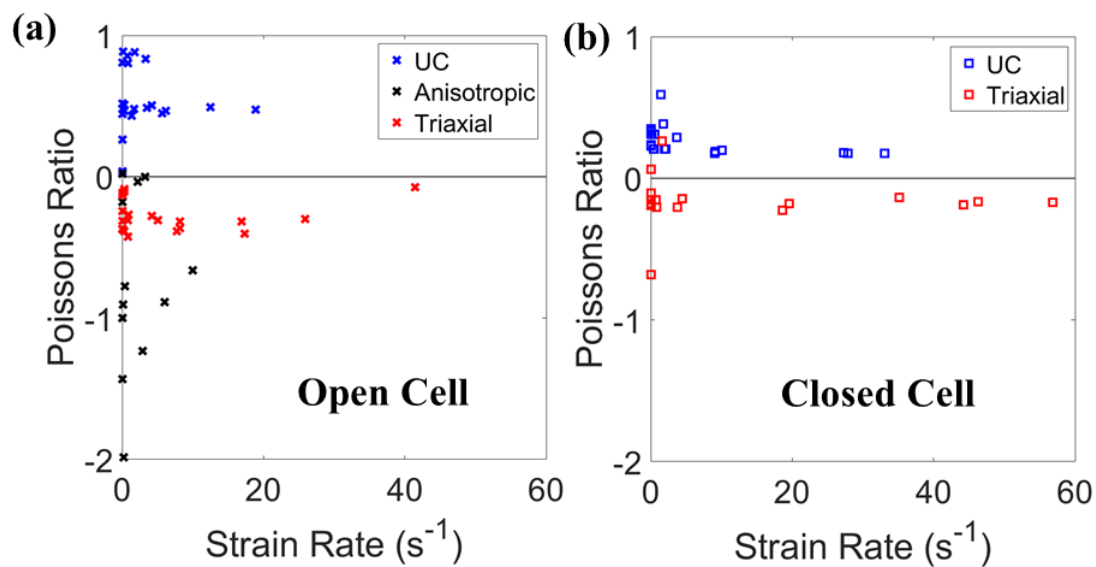

**Figure S1.** Poisson's ratios of (a) open cell and (b) closed cell foam measured to 2% compression vs. axial engineering strain rate, from DIC.

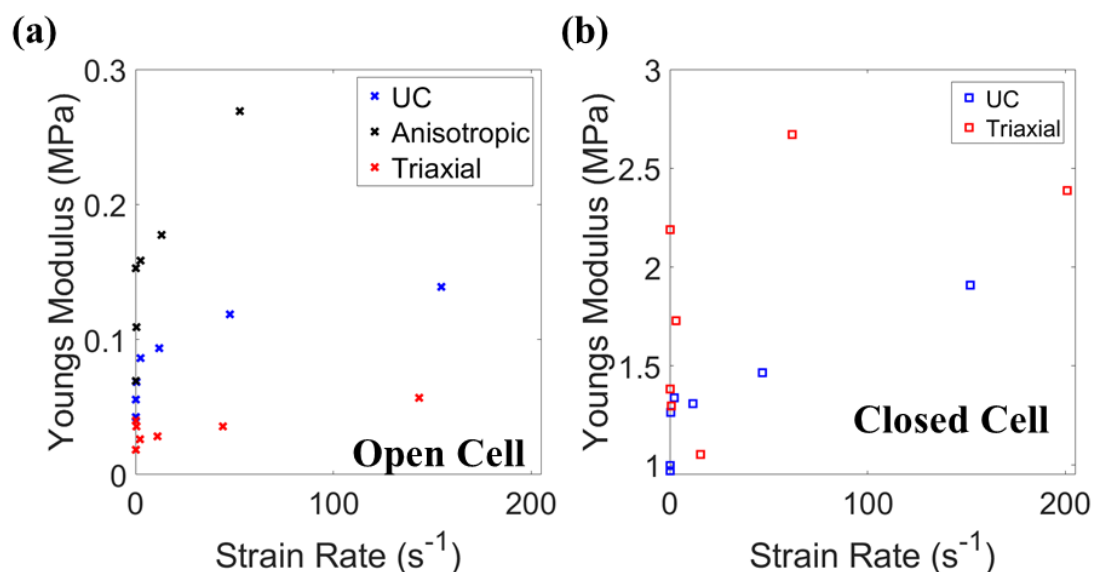

**Figure S2.** Young's moduli of (a) open cell and (b) closed cell foam measured to 2% compression vs. axial engineering strain rate.

**Table S1.** Mean density, Poisson's ratio and Young's moduli for all samples at minimum and maximum strain rates. Standard deviation (after  $\pm$ ) provided for low strain rate values and density measurements, where repeat testing was undertaken. Note alternative units for closed cell foams.

|                                 | Open Cell         |                   |                   | Closed Cell     |                  |
|---------------------------------|-------------------|-------------------|-------------------|-----------------|------------------|
|                                 | UC                | Anisotropic       | Triaxial          | UC              | Triaxial         |
| Density<br>(kg/m <sup>3</sup> ) | 30.4 $\pm$ 0.51   | 36.0 $\pm$ 0.1    | 50.9 $\pm$ 6.7    | 50.3 $\pm$ 0.7  | 156.3 $\pm$ 23.8 |
| $\nu$ 0.1 mm/s                  | 0.27 $\pm$ 0.04   | -2.02 $\pm$ 0.38  | -0.35 $\pm$ 0.10  | 0.32 $\pm$ 0.03 | -0.12 $\pm$ 0.01 |
| $\nu$ 3,250 mm/s                | 0.43              | -1.24             | -0.30             | 0.18            | -0.06            |
| E 0.1 mm/s<br>(MPa)             | 0.047 $\pm$ 0.001 | 0.086 $\pm$ 0.022 | 0.024 $\pm$ 0.001 | 1.07 $\pm$ 0.03 | 0.98 $\pm$ 0.02  |
| E 3,250 mm/s<br>(MPa)           | 0.140             | 0.194             | 0.043             | 2.08            | 1.74             |
